# Supplementary material
Source: HighWire-hosted journal article supplement (https://bibliotheek.ehb.be/content/28/2/146)
Supplement: inline-supplementary-material-4 [file inline-supplementary-material-4.pdf]

## Supplemental Tables:

Supplemental Table 4. Characteristics of Top-Viewed JUUL-related Videos on YouTube

| JUUL YouTube Videos | Title                                                               | # of Views as of March 1, 2018 | # of Likes as of March 1, 2018 | # of Dislikes as of March 1, 2018 | Posted Date | Category         | Age Category of the People in the Video | Gender and # of People in the Video |
|---------------------|---------------------------------------------------------------------|--------------------------------|--------------------------------|-----------------------------------|-------------|------------------|-----------------------------------------|-------------------------------------|
| 1                   | JUUL by Juul Vapor Review - One Of The Best Products For Beginners? | 653,138                        | 3,000                          | 311                               | 7-Mar-17    | product review   | Adults                                  | One male and one female             |
| 2                   | JUUL vs PHIX   Which One Is The Better Option For YOU??             | 512,553                        | 2,000                          | 229                               | 10-Jul-17   | product review   | Young adults                            | One male                            |
| 3                   | Vaping The JUUL: IMO Best E-Cig To Quit Smoking!                    | 443,001                        | 3,000                          | 203                               | 20-Oct-16   | product review   | Adults                                  | One male                            |
| 4                   | The JUUL - Best E-Cig Ever? - Review!                               | 436,560                        | NA                             | NA                                | 22-Jun-16   | product review   | Adults                                  | One female                          |
| 5                   | How to: DIY JUUL CHARGER                                            | 415,512                        | 1,000                          | 90                                | 13-Oct-16   | modification     | Unclear                                 | Unclear                             |
| 6                   | Juul Tips & Tricks                                                  | 312,282                        | 666                            | 547                               | 24-Oct-17   | product review   | Youth/young adults                      | One male                            |
| 7                   | Charging a Juul Without a Real Juul Charger (works for phix too)    | 316,846                        | 1,000                          | 97                                | 16-Jun-16   | modification     | Youth/young adults                      | One male                            |
| 8                   | JUUL by PAX and my thoughts                                         | 314,705                        | 3,000                          | 170                               | 1-Jan-17    | product review   | Old Adults                              | One male                            |
| 9                   | The Juul!   IndoorSmokers                                           | 311,316                        | 2,000                          | 114                               | 20-Apr-17   | product review   | Adults                                  | Two males                           |
| 10                  | How To: DIY JUUL                                                    | 297,025                        | 2,000                          | 125                               | 8-Mar-17    | modification     | Young adults                            | One male                            |
| 11                  | Just Breathe In - Underage Juul Use                                 | 298,978                        | 4,000                          | 875                               | 22-Dec-17   | news/documentary | Youth/young adults                      | Multiple males                      |

|    |                                                                 |         |       |     |           |                                    |                    |                            |
|----|-----------------------------------------------------------------|---------|-------|-----|-----------|------------------------------------|--------------------|----------------------------|
|    | Documentary                                                     |         |       |     |           |                                    |                    |                            |
| 12 | PHIX VAPE by MLV   Is it better than the JUUL?                  | 270,820 | 1,000 | 81  | 1-Mar-17  | product review/competitive product | Young adults       | One male                   |
| 13 | How I Quit Cigarettes (JUUL Review)                             | 246,171 | 7,000 | 109 | 3-Nov-17  | product review                     | Young adults       | One male                   |
| 14 | How to turn your JUUL gold                                      | 244,541 | 962   | 49  | 26-Apr-17 | modification/cross substance       | Youth/young adults | One male                   |
| 15 | Juul Vapor Do it yourself Pod Refill using Mr.Salt-E Fluid      | 221,597 | 1,000 | 70  | 9-Jan-17  | product review                     | Young adults       | One male                   |
| 16 | JUUL TALK                                                       | 193,125 | 6,000 | 77  | 22-Sep-17 | lifestyle - surfing                | Young adults       | Multiple males and females |
| 17 | JUUL Vapor System - Great for beginners AND advance!   TiaVapes | 192,429 | 1,000 | 112 | 1-Apr-17  | product review                     | Young adults       | One female                 |
| 18 | Juul Compilation   Your Submissions!   #Doit4Juul               | 191,438 | 958   | 175 | 4-Oct-17  | #Doit4Juul                         | Youth              | multiple men and women     |
| 19 | How to Hack a Juul                                              | 184,764 | 856   | 81  | 24-Mar-16 | modification                       | Adults             | One male                   |
| 20 | Juul vs Myjet vs iCare BEST Review EVER!                        | 182,486 | 765   | 209 | 28-Sep-16 | product review                     | Youth/young adults | Three males                |
| 21 | Juul Not Working? LED Works, No Draw?                           | 179,090 | 708   | 51  | 24-Jun-17 | product review                     | Adults             | One male                   |
| 22 | XFire Vape Pen - Better than Juul?                              | 165,853 | 1,000 | 206 | 22-Aug-17 | product review                     | Youth/young adults | One female                 |
| 23 | Hack for JUUL fiends                                            | 159,505 | NA    | NA  | 9-Aug-17  | modification                       | Youth/young adults | One female                 |
| 24 | Juul maximum flavor and airflow                                 | 152,823 | 437   | 69  | 15-May-16 | modification                       | Adults             | One male                   |

|    |                                                                                                         |           |        |       |                   |                                          |                       |               |
|----|---------------------------------------------------------------------------------------------------------|-----------|--------|-------|-------------------|------------------------------------------|-----------------------|---------------|
| 25 | A Juul Killer!<br>The Suorin<br>Ishare!<br>Beginner Vape!<br>Best Vape Pen<br>2018! Refillable<br>Pods! | 150,262   | 3,000  | 145   | 18-<br>Feb-<br>18 | product<br>review/competitive<br>product | Adults                | One<br>male   |
| 26 | How to hack /<br>refill JUUL<br>vapor pods by<br>PAX Labs /<br>JUUL Vapor<br>with your own<br>juice.    | 141,484   | 375    | 15    | 1-Jul-<br>15      | modification                             | Adults                | One<br>male   |
| 27 | DIY Juul<br>Charger Easy<br>and Works!                                                                  | 140,454   | 323    | 40    | 12-<br>Oct-17     | modification                             | Youth/young<br>adults | One<br>male   |
| 28 | How to fix your<br>Juul                                                                                 | 136,939   | 371    | 51    | 1-Jul-<br>17      | modification                             | Youth/young<br>adults | One<br>male   |
| 29 | HOW TO GET A<br>FREE JUUL<br>(COOL<br>CUCUMBER)                                                         | 136,047   | 1,000  | 541   | 26-<br>Nov-<br>17 | product review                           | Youth/young<br>adults | One<br>male   |
| 30 | how to do<br>tricks with a<br>Juul                                                                      | 135,464   | 409    | 644   | 28-<br>Sep-<br>17 | product review-use<br>experience         | Youth                 | One<br>male   |
| 31 | How To Refill<br>JUUL Pods                                                                              | 120,898   | 285    | 31    | 22-Jul-<br>16     | modification                             | Youth                 | One<br>female |
| 32 | NickTheSmoker<br>- JUUL                                                                                 | 117,082   | 1,000  | 75    | 15-<br>Jun-17     | product review                           | Youth                 | One<br>male   |
| 33 | Juul Battery<br>Removal                                                                                 | 109,542   | 150    | 26    | 25-<br>Jan-17     | modification                             | Adults                | One<br>male   |
| 34 | Juul How to get<br>Huge Clouds<br>Easy!                                                                 | 110,145   | 325    | 160   | 13-<br>Nov-<br>17 | product review<br>how to                 | Youth/young<br>adults | One<br>male   |
| 35 | The BEST E-<br>Liquid For The<br>Eleaf iCare,<br>Wismec MyJet,<br>JUUL & More!                          | 102,148   | 704    | 30    | 15-<br>Feb-<br>17 | product<br>review/competitive<br>product | Young adults          | One<br>male   |
|    | Total                                                                                                   | 8,297,023 | 51,294 | 5,808 |                   |                                          |                       |               |
